# Supplementary material
Source: Springer Nature journal article supplement (https://www.springermedizin.de/resource/supplementary/12889_2013_6987_MOESM4_ESM.pdf/9499546)

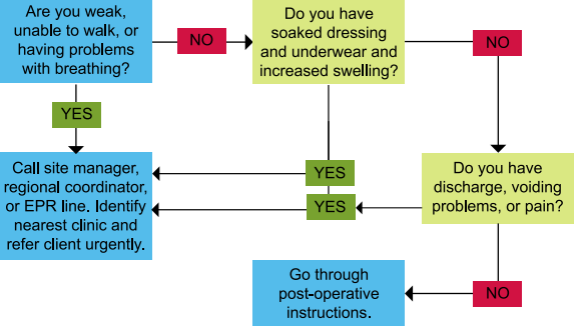

Supplement: MOESM4 [file 9499546]
